# Supplementary material for: Quantifying sociodemographic heterogeneities in the distribution of Aedes aegypti among California households
Source: PubMed Central journal article supplement (PMC7394445; doi:10.1371/journal.pntd.0008408), 2020-07-21
Supplement: pntd.0008408.s001.pdf [file pntd.0008408.s001.pdf]

## Los Angeles County Mosquito Survey

**Date of Visit (mm/dd/yy):** \_\_\_\_\_  
**Collection ID:** \_\_\_\_\_ **Occupant:** \_\_\_\_\_  
**Address:** \_\_\_\_\_  
**Telephone:** \_\_\_\_\_

Collector: \_\_\_\_\_ Surveyor: \_\_\_\_\_  
 Collection time (e.g. 3:30 pm): \_\_\_\_\_

**Human behavior:**

Does anyone at the home get bit by mosquitoes? Yes No Don't know  
 How long have residents lived in this home? \_\_\_\_\_ How many people live at this residence? \_\_\_\_\_

Number of people typically at home:

Weekdays (Mon-Fri or other work days): \_\_\_\_\_ Weekends (Sat-Sun or other non-work days): \_\_\_\_\_  
 Day (8am-5pm): \_\_\_\_\_ Night (5pm-8am): \_\_\_\_\_ Day (8am-5pm): \_\_\_\_\_ Night (5pm-8am): \_\_\_\_\_

How many hours does each person spent **outdoors** at home? (Person-hours, cumulative for all household members):

(For each person, add up the no. of hours each person spends outdoors at home to calculate person-hours)

| Weekday Daytime (8am-5pm): | Weekday Nighttime (5pm-8am): | Weekend daytime (8am-5pm): | Weekend Nighttime (5pm-8am): |
|----------------------------|------------------------------|----------------------------|------------------------------|
|                            |                              |                            |                              |

Weekdays (Mon-Fri or other work days): \_\_\_\_\_ Weekends (Sat-Sun or other non-work days): \_\_\_\_\_

Total Day person-hours: \_\_\_\_\_ Total Day person-hours: \_\_\_\_\_

Total Night person-hours: \_\_\_\_\_ Total Night person-hours: \_\_\_\_\_

How many people in the household are home-bound or retired? (Spend most time at home) \_\_\_\_\_

**Household behaviors:**

No. of bedrooms: \_\_\_\_\_ No. of all rooms (including bedrooms): \_\_\_\_\_ No. of windows (that open): \_\_\_\_\_

No. of windows with intact screens: \_\_\_\_\_

No. of exterior doors: \_\_\_\_\_ Do these doors have intact screens on them? Yes No

No. of windows open during: Day: \_\_\_\_\_ Evening: \_\_\_\_\_ Non-work day: Day: \_\_\_\_\_ Evening: \_\_\_\_\_

Time frame windows are open (e.g. 8-10am): Day: \_\_\_\_\_ Evening: \_\_\_\_\_ Non-work day: Day: \_\_\_\_\_ Evening: \_\_\_\_\_

No. of doors open during (with or without screens): Day: \_\_\_\_\_ Evening: \_\_\_\_\_ Non-work day: Day: \_\_\_\_\_ Evening: \_\_\_\_\_

Time frame doors are open (e.g. 8-10am): Day: \_\_\_\_\_ Evening: \_\_\_\_\_ Non-work day: Day: \_\_\_\_\_ Evening: \_\_\_\_\_

Air-conditioning:  None  Central  Window unit(s)  Other: \_\_\_\_\_

If air-conditioning present, total number of hours air-conditioning is on: \_\_\_\_\_

Weekdays (Mon-Fri or other work days): \_\_\_\_\_ Weekends (Sat-Sun or other non-work days): \_\_\_\_\_  
 Day (8am-5pm): \_\_\_\_\_ Night (5pm-8am): \_\_\_\_\_ Day (8am-5pm): \_\_\_\_\_ Night (5pm-8am): \_\_\_\_\_

Do you store water? (Not water bottles) Yes No If Yes: Indoors Outdoors Is it: Covered Uncovered

Do you have gutters? Yes No If Yes, do you clean your gutters (or have someone else do it)? Yes No

How many times per year? \_\_\_\_\_

Does someone come to your house to do professional yard maintenance? Yes No If Yes, how many times per month? \_\_\_\_\_

Is there a sprinkler system present? Yes No If Yes, how many times per week is it on? \_\_\_\_\_

Do you perform any mosquito control in your house at your own expense? Yes No

If Yes, date of last application: \_\_\_\_\_

Type of control: \_\_\_\_\_

Do household members ever wear repellent?  All of them do  Some of them do  None of them do

**Animals on the property:** No animals present

|              | How many? | Hours spent indoors | Hours spent outdoors |
|--------------|-----------|---------------------|----------------------|
| Dogs         |           |                     |                      |
| Cats         |           |                     |                      |
| Chickens     |           |                     |                      |
| Other: _____ |           |                     |                      |
| Other: _____ |           |                     |                      |

**Outside house characteristics:**

No. of potted plants outside house (in yard):  0  1-5  6-10  11-15  16-20  20+

No. of containers in yard that do or have the potential to collect water (i.e. fountains, toys, trash, laundry buckets etc.):  0  1-5  6-10  11-15  16-20  20+

How many of these containers are exposed to rain (uncovered and not under shelters)? \_\_\_\_\_ (Estimate)

How many containers have standing water in them? \_\_\_\_\_

Are there bushes/shrubs in the yard? Yes No

Are there trees in the yard? Yes No

Is there grass in the yard? Yes No

Is there a pool at the house? Yes No If Yes, is it full? Yes No

If full, is it clean? Clean Mostly clean Not clean

Lawn drains present? Yes No If Yes: Covered Uncovered

House drainpipe present? Yes No If Yes, is it: Covered Uncovered

**Inside house characteristics:**

No. of potted plants inside house:  0  1-5  6-10  11-15  16-20  20+

No. of containers inside house that store water (i.e. dog bowls, fountains, toys etc.):

0  1-5  6-10  11-15  16-20  20+

**Mosquito Collection (adults):**

Estimated area of the house (ft<sup>2</sup>): \_\_\_\_\_ Estimated area of the yard (front and back, ft<sup>2</sup>): \_\_\_\_\_

Collection duration (in minutes) for adults: Inside: \_\_\_\_\_ Outside: \_\_\_\_\_

Did you identify mosquito larvae or pupae in water sources around the house or yard?  Yes  No

How many containers had larvae or pupae in them? Inside: \_\_\_\_\_ Outside: \_\_\_\_\_

No. of adult *Ae. aegypti* found in lawn drain: \_\_\_\_\_

**Notes/Issues that arose during survey:**

**For after the survey:**

Were there any *Ae. aegypti* collected at the house? If yes, how many were collected:

Inside? Males \_\_\_\_\_ Females \_\_\_\_\_ Outside? Males \_\_\_\_\_ Females \_\_\_\_\_

How many of these were blood-engorged? Inside \_\_\_\_\_ Outside \_\_\_\_\_
